# Supplementary material
Source: HighWire-hosted journal article supplement (https://www.ajnr.org/highwire/filestream/104814/field_highwire_adjunct_files/0/1037.pdf)
Supplement: 1037.pdf [file 1037.pdf]

**Table 1.** Characteristics of all 30 patients with BMD and the 30 controls

|                         | Controls |      |       | BMD  |      |       | BMD_Dp140- |      |       | BMD_Dp140+ |      |       | p*   |
|-------------------------|----------|------|-------|------|------|-------|------------|------|-------|------------|------|-------|------|
|                         | n=30     |      |       | n=30 |      |       | n=18       |      |       | n=10       |      |       |      |
|                         | Mean     | SD   | Range | Mean | SD   | Range | Mean       | SD   | Range | Mean       | SD   | Range |      |
| Age at recruitment, yrs | 38.9     | 12.2 | 20–67 | 37.8 | 12.5 | 18–67 | 39.8       | 14.2 | 18–67 | 34.9       | 10.1 | 18–52 | 0.41 |
| Age at onset, yrs       |          |      |       | 11.0 | 10.6 | 1–38  | 12.6       | 11.4 | 1–38  | 9.1        | 10.0 | 1–36  | 0.55 |
| Duration, yrs           |          |      |       | 26.7 | 12.6 | 3–66  | 27.1       | 14.3 | 3–66  | 25.6       | 10.8 | 10–46 | 0.90 |
| Steroid treatment, n    |          |      |       | 4    |      |       | 2          |      |       | 2          |      |       | 0.60 |

\* Comparison between the BMD\_Dp140+ and BMD\_Dp140- subgroups. BMD: Becker muscular dystrophy, SD: standard deviation

**Table 2.** IQ values of the Wechsler Adult Intelligence Scale-III scale for 16 of the patients with BMD

|                | <b>BMD<br/>n=16</b> |           |              |             | <b>BMD_Dp140-<br/>n=9</b> |           |              |             | <b>BMD_Dp140+<br/>n=7</b> |           |              |             | <b>p**</b> |
|----------------|---------------------|-----------|--------------|-------------|---------------------------|-----------|--------------|-------------|---------------------------|-----------|--------------|-------------|------------|
|                | <b>Mean</b>         | <b>SD</b> | <b>Range</b> | <b>Abn*</b> | <b>Mean</b>               | <b>SD</b> | <b>Range</b> | <b>Abn*</b> | <b>Mean</b>               | <b>SD</b> | <b>Range</b> | <b>Abn*</b> |            |
| Full-scale IQ  | 95.8                | 16.6      | 70–137       | 0           | 91.0                      | 20.5      | 70–137       | 0           | 102.0                     | 7.3       | 87–108       | 0           | 0.08       |
| Performance IQ | 92.2                | 16.6      | 68–134       | 1           | 89.1                      | 19.4      | 68–134       | 1           | 96.1                      | 16.6      | 75–112       | 0           | 0.18       |
| Verbal IQ      | 99.0                | 17.4      | 66–135       | 1           | 94.0                      | 20.9      | 66–135       | 1           | 105.4                     | 9.6       | 91–117       | 0           | 0.11       |

\*The abnormal IQ range is defined as <70.

\*\*Comparison between the BMD\_Dp140+ and BMD\_Dp140- subgroups. Abn: abnormal, BMD: Becker muscular dystrophy, IQ: intelligence quotient.
